# Supplementary material
Source: MDPI journal article supplement (https://www.mdpi.com/2073-4441/14/21/3386)
Supplement: s1 [file s1]

## Supplemental materials

Table S1. Data collection information

| No. | Data                                                                                |                                                                      | Resolution                             | Data sources                                                                  |
|-----|-------------------------------------------------------------------------------------|----------------------------------------------------------------------|----------------------------------------|-------------------------------------------------------------------------------|
| 1   | Urban-rural composition of the population                                           |                                                                      | Baoding City                           | Hebei<br>Economic<br>Yearbook (2017<br>& 2018)                                |
| 2   | Population                                                                          |                                                                      |                                        |                                                                               |
| 3   | Energy consumption per unit of GDP                                                  |                                                                      |                                        |                                                                               |
| 4   | The output quantifies of livestock and poultry products                             |                                                                      |                                        |                                                                               |
| 5   | The number of livestock and poultry products in stock at the end of the year        |                                                                      |                                        |                                                                               |
| 6   | Production of aquatic products                                                      |                                                                      |                                        |                                                                               |
| 7   | Main indicators of the national economy                                             | Gross domestic product                                               | Districts and counties of Baoding City |                                                                               |
|     |                                                                                     | Total number of households/population in the countryside             |                                        |                                                                               |
|     |                                                                                     | Total fertilizer use                                                 |                                        |                                                                               |
|     |                                                                                     | Efficient irrigation of the area                                     |                                        |                                                                               |
|     |                                                                                     | Total sown area of crops                                             |                                        |                                                                               |
|     |                                                                                     | Grain cultivation area                                               |                                        |                                                                               |
|     |                                                                                     | Grain/oil/cotton/vegetable/garden/fruit production                   |                                        |                                                                               |
|     |                                                                                     | Pig output/stock                                                     |                                        |                                                                               |
| 8   | The main food consumption per capita of rural residents                             |                                                                      | Hebei Province                         |                                                                               |
| 9   | The main crops sown area/yield                                                      |                                                                      |                                        |                                                                               |
| 10  | Population birth/death rate                                                         |                                                                      | Baoding City/<br>Xiongan New area      | Hebei Rural Statistical Yearbook (2018 & 2019)                                |
| 11  | population of rural households                                                      |                                                                      |                                        |                                                                               |
| 12  | Fertilizer/pesticide use                                                            |                                                                      |                                        |                                                                               |
| 13  | Water-saving irrigation                                                             |                                                                      |                                        |                                                                               |
| 14  | Sowing area and yield of grain/oilseed/cotton/raw hemp/beet/tobacco/vegetable/fruit |                                                                      |                                        |                                                                               |
| 15  | Livestock output/stock                                                              |                                                                      |                                        |                                                                               |
| 16  | Main indicators of the national economy                                             | Utilization of fertilizer (purification method)/pesticide/mulch film |                                        |                                                                               |
|     |                                                                                     | Rice/wheat/corn/soybean sown area and yield                          |                                        |                                                                               |
|     |                                                                                     | Oil/cotton/sugar/vegetable sown area and yield                       |                                        |                                                                               |
|     |                                                                                     | Meat/eggs/milk production                                            |                                        |                                                                               |
|     |                                                                                     | Pigs/cattle/sheep output/stock                                       |                                        |                                                                               |
|     |                                                                                     | Aquatic products                                                     |                                        |                                                                               |
| 17  | Agricultural/forestry/grazing/fishery output                                        |                                                                      | Xiongxian and Rongcheng County         | Xiongxian statistical bulletins (2017, 2018 & 2019).<br>Rongcheng statistical |
| 18  | Wheat/corn/oilseed/vegetable/fruit sown area                                        |                                                                      |                                        |                                                                               |
| 19  | Wheat/corn/oilseed/vegetable/fruit yield                                            |                                                                      |                                        |                                                                               |
| 20  | Meat/eggs/milk production                                                           |                                                                      |                                        |                                                                               |
| 21  | Pigs/sheep/cattle output/stock                                                      |                                                                      |                                        |                                                                               |
| 22  | Rural/urban household population                                                    |                                                                      |                                        |                                                                               |

|    |                                                             |                                                                                       |                                        |                                                   |
|----|-------------------------------------------------------------|---------------------------------------------------------------------------------------|----------------------------------------|---------------------------------------------------|
|    |                                                             |                                                                                       |                                        | bulletins (2017 & 2018).                          |
| 23 | Population Changes                                          |                                                                                       | Districts and counties of Baoding City | Baoding Economic Statistical Yearbook (2018)      |
| 24 | Gross domestic product                                      |                                                                                       |                                        |                                                   |
| 25 | Agricultural land                                           |                                                                                       |                                        |                                                   |
| 26 | Food/crops/forestry production                              |                                                                                       |                                        |                                                   |
| 27 | Livestock/fishery production                                |                                                                                       |                                        |                                                   |
| 28 | The consumption of food per capita households               |                                                                                       |                                        |                                                   |
| 29 | Registered population                                       |                                                                                       | Districts and counties                 | Statistical Yearbook of China Counties (2018)     |
| 30 | Number of industrial enterprises                            |                                                                                       |                                        |                                                   |
| 31 | Total industrial wastewater discharge                       |                                                                                       | Baoding Municipal District             | Urban Statistical Yearbook of China (2018)        |
| 32 | Sewage/household waste disposal rate                        |                                                                                       |                                        |                                                   |
| 33 | Rural toilet improvements                                   |                                                                                       | Hebei Province                         | Environmental Statistics Yearbook of China (2017) |
| 34 | Irrigation area and application of chemical fertilizers     |                                                                                       |                                        |                                                   |
| 35 | Plastic films and pesticides                                |                                                                                       |                                        |                                                   |
| 36 | Discharge and treatment of industrial wastewater            |                                                                                       | Baoding City                           | Environmental Yearbook of China (2015)            |
| 37 | Agricultural pollution emissions                            |                                                                                       |                                        |                                                   |
| 38 | Discharge and treatment of urban domestic pollution         |                                                                                       |                                        |                                                   |
| 39 | Sewage treatment situation                                  |                                                                                       |                                        |                                                   |
| 40 | Domestic waste disposal                                     |                                                                                       |                                        |                                                   |
| 41 | Afforestation area                                          |                                                                                       | Districts and counties                 | Forestry Statistical Yearbook of China (2018)     |
| 42 | Industry information of key pollution discharge enterprises | Type/address/production cycle                                                         | Baoding City                           | Government information disclosure (2018 & 2021)   |
|    |                                                             | Total emissions/concentration of COD/ammonia nitrogen/total phosphorus/total nitrogen |                                        |                                                   |
|    |                                                             | Outlet location/number                                                                |                                        |                                                   |

Table S2 Parameters sources used in RUSLE model

| No. | Data catagories    | Data sources                                                              |
|-----|--------------------|---------------------------------------------------------------------------|
| 1   | Long-time Rainfall | China Meteorological Administration and U.S. National Climate Data Center |

|   |                     |                                                                                              |
|---|---------------------|----------------------------------------------------------------------------------------------|
| 2 | Soil property       | Soil dataset of China from the Second National Soil Census                                   |
| 3 | Soil silty          | Harmonized World Soil Database version 1.1, HWSD                                             |
| 4 | Terrain             | ASTER GDEM 30m                                                                               |
| 5 | Vegetation coverage | Spatial distribution dataset of China Annual Vegetation Index (NDVI).                        |
| 6 | Land use            | Spatial distribution dataset of remote sensing monitoring of land use types in China in 2020 |

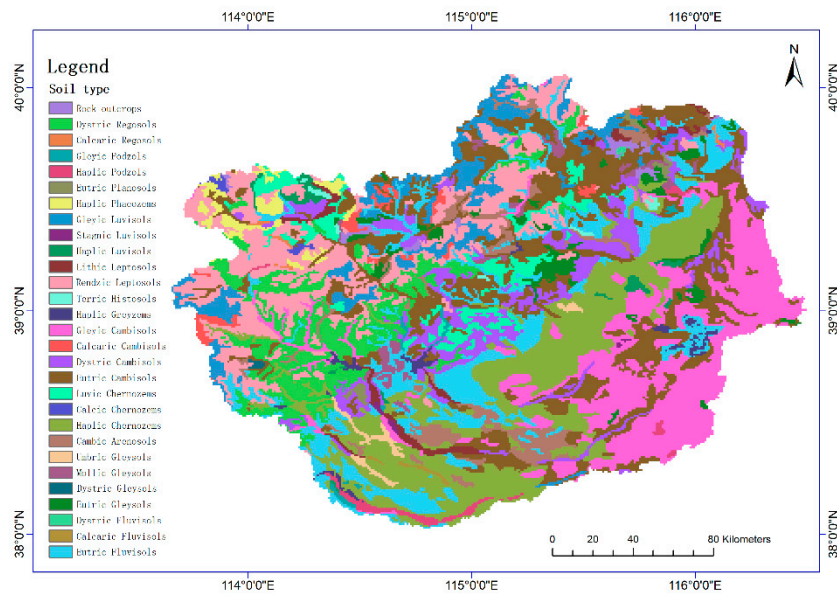

Figure S1. The soil type of Baiyangdian lake Basin.

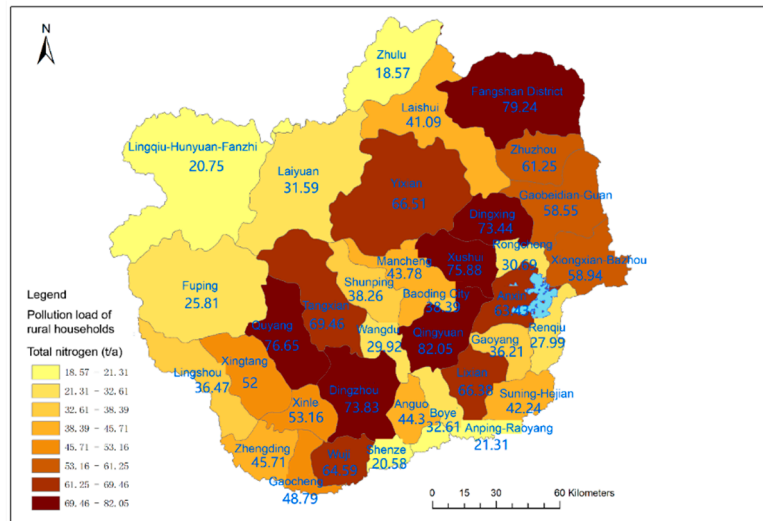

a

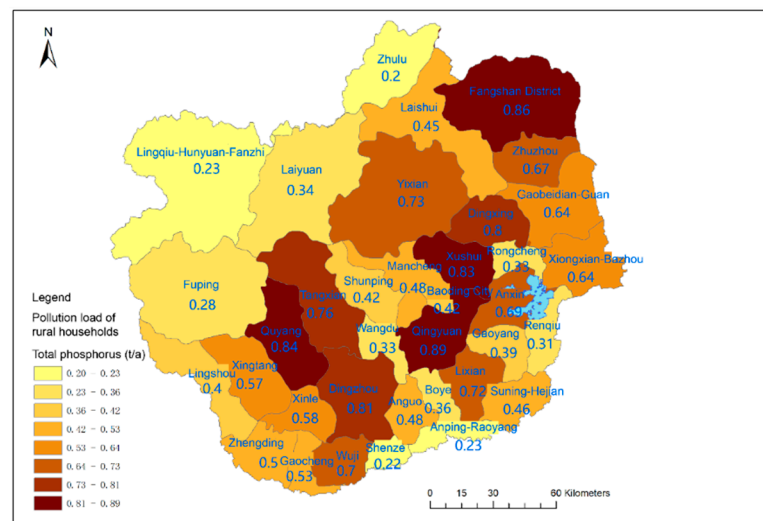

b

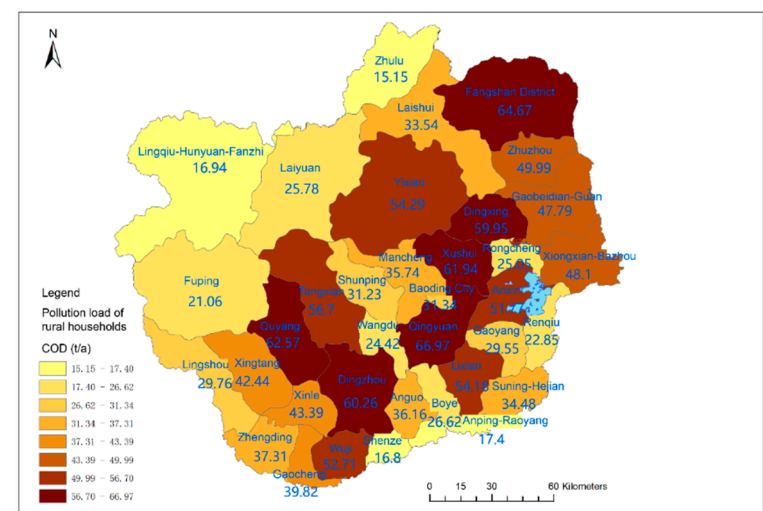

c

Figure S2. Non-point source pollution load of rural life in all districts and counties of the

Baiyang Lake  
(a: Total nitrogen load; b: Total phosphorus load; c: COD load)

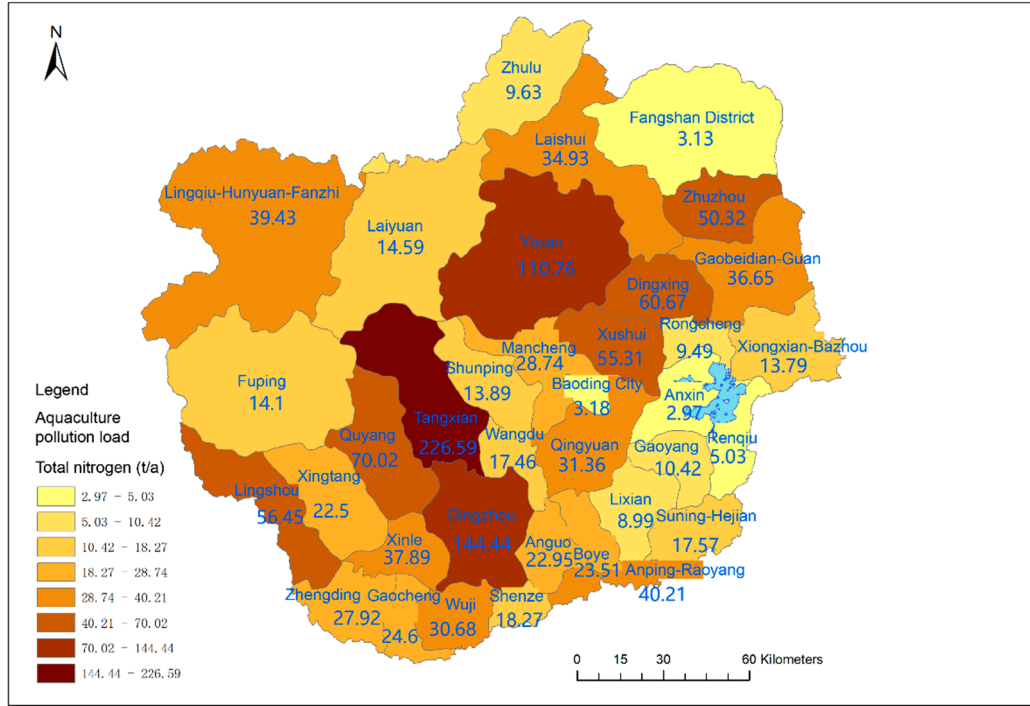

a

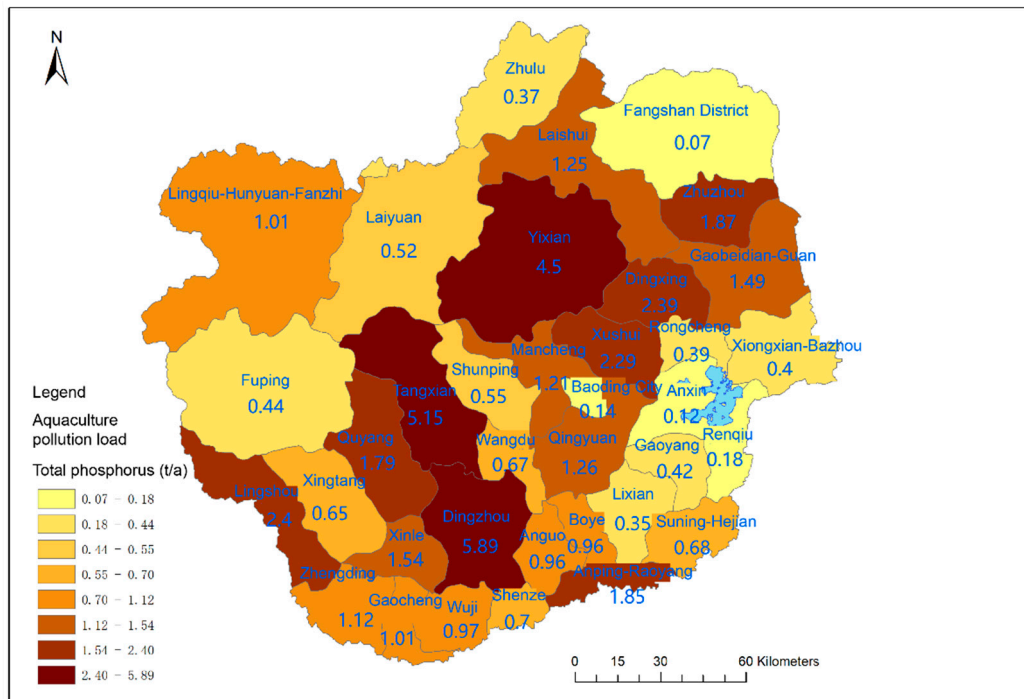

b

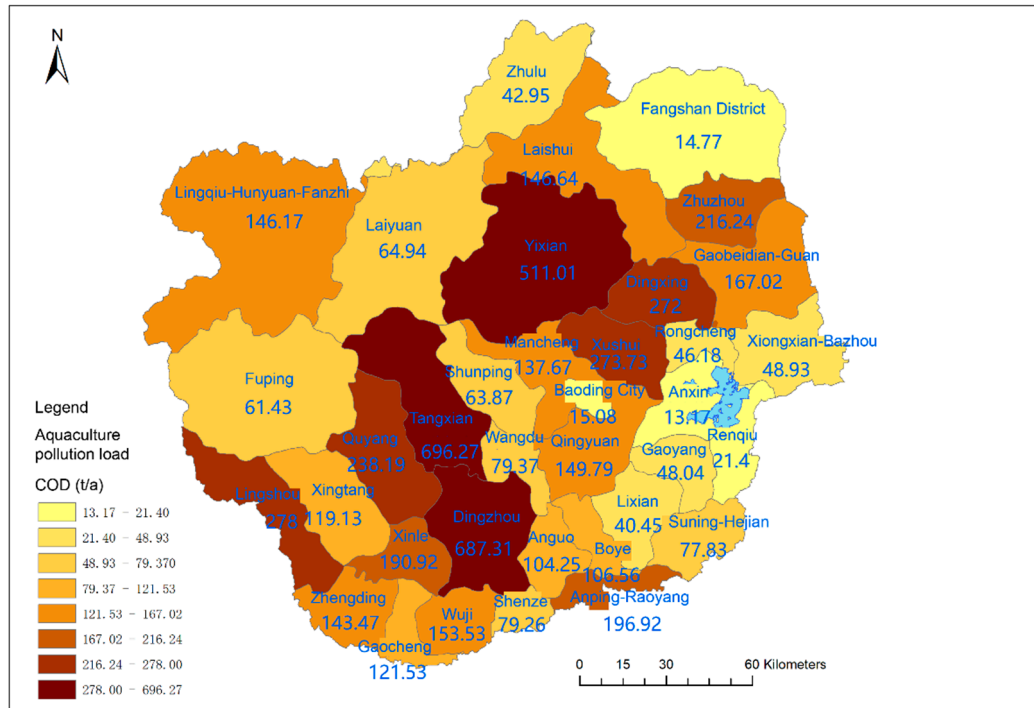

c

Figure S3. Non-point source pollution load of livestock and poultry in various districts and counties of Baiyang Lake  
(a: Total nitrogen load; b: Total phosphorus load; c: COD load)

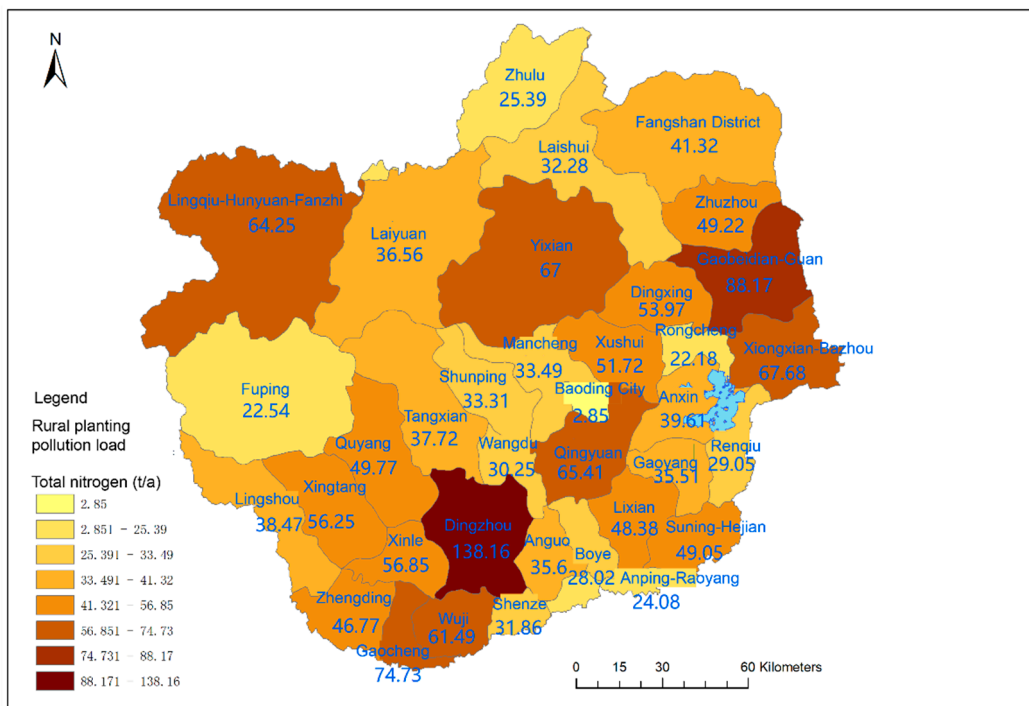

[illegible]

**Legend**

Rural planting pollution load

COD (t/a)

|                |
|----------------|
| 2.110000       |
| 2.111 - 17.76  |
| 17.761 - 22.00 |
| 22.001 - 24.58 |
| 24.581 - 32.46 |
| 32.461 - 42.21 |
| 42.211 - 53.31 |
| 53.311 - 89.84 |

Map labels (COD load values):

- Zhulu: 15.39
- Laishui: 20.42
- Fangshan District: 28.52
- Zhuzhou: 31.96
- Gaobedian-Qian: 53.31
- Yixian: 41.08
- Dingding: 35.75
- Mancheng: 21.24
- Xushui: 32.46
- Rongcheng: 13.98
- Xongxian-Gaozhou: 40.86
- Shunping: 21.24
- Tangxian: 22.85
- Guayang: 24.58
- Wangdi: 19.01
- Qingyuan: 42.21
- Anxin: 24.21
- Gaoyang: 21.62
- Lixian: 31.76
- Suning-Hejian: 31.97
- Rehqlu: 17.76
- Lingshou: 23.8
- Zhangshu: 35.17
- Dingzhou: 89.84
- Anguo: 22.64
- Boye: 17.4
- Anping-Raoyang: 16.29
- Shenze: 19.8
- Guochang-Wuji: 46.11
- Zhongding: 30.05
- Xinlu: 35.97
- Fuping: 14.02
- Lingjiu-Huyuan-Fanzhi: 38.51
- Laiyuan: 22

Figure S4. Non-point source pollution load of agricultural planting in various districts and counties of Baiyang Lake  
(a: Total nitrogen load; b: Total phosphorus load; c: COD load)
